# Supplementary material
Source: HighWire-hosted journal article supplement (http://thorax.bmjjournals.com/highwire/filestream/174093/field_highwire_adjunct_files/2/633259webonlyapp3.pdf)

# Figure S2

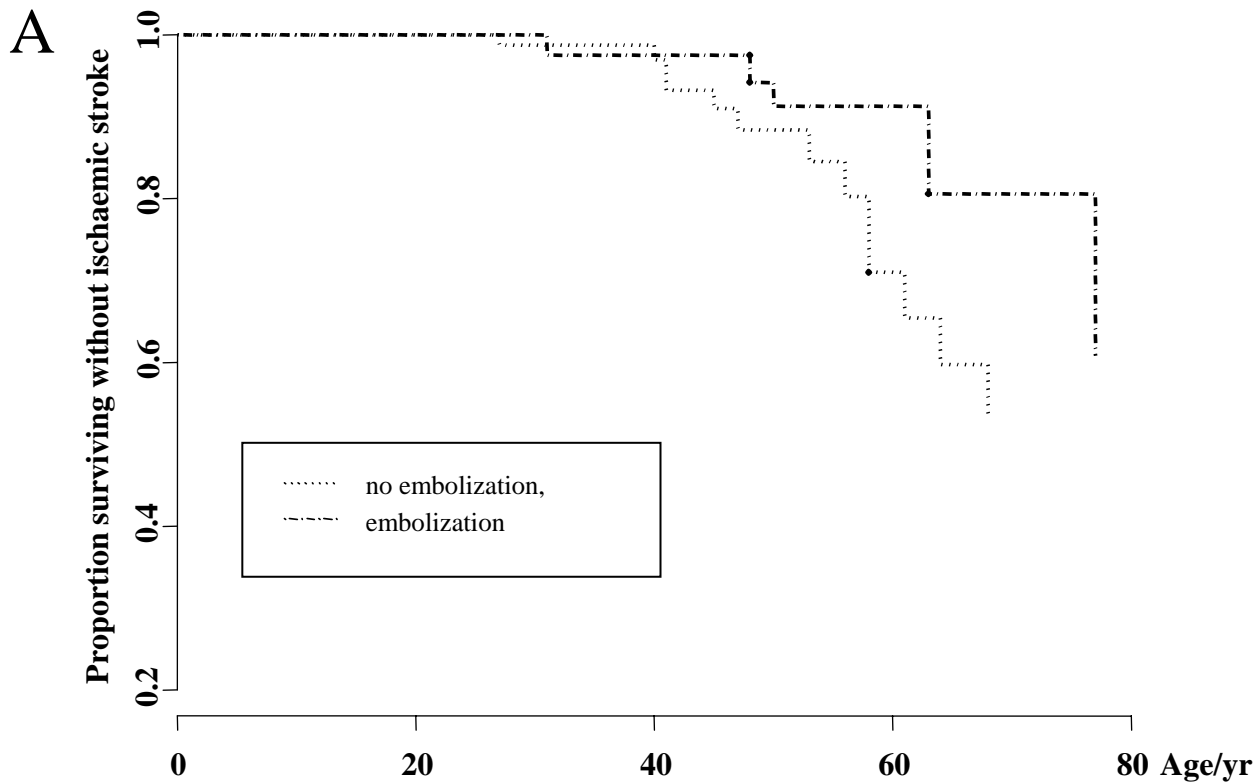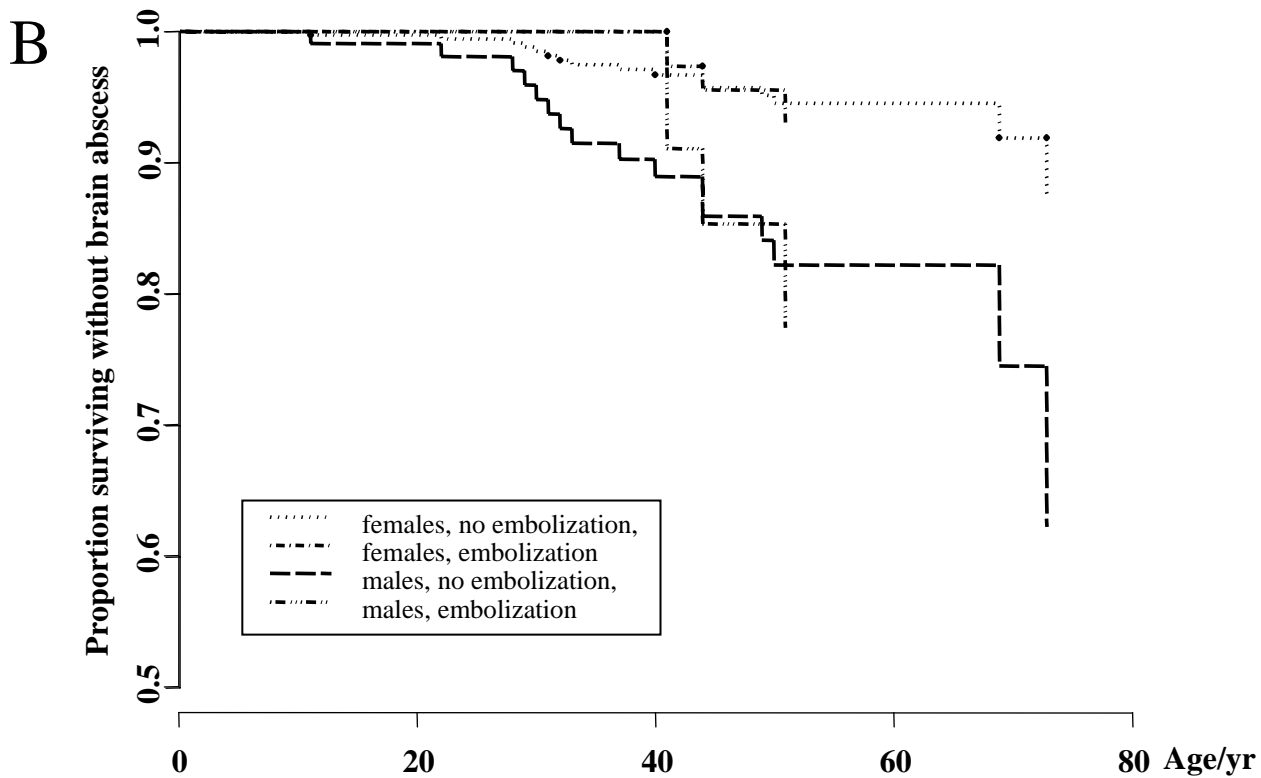

Supplement: 633259webonlyapp3.pdf [file 633259webonlyapp3.pdf]
